# Supplementary material
Source: publisher site journal article supplement (https://www.dovepress.com/article/489870)
Supplement: Supplementary file 1 [file get_supplementary_file.php]

**
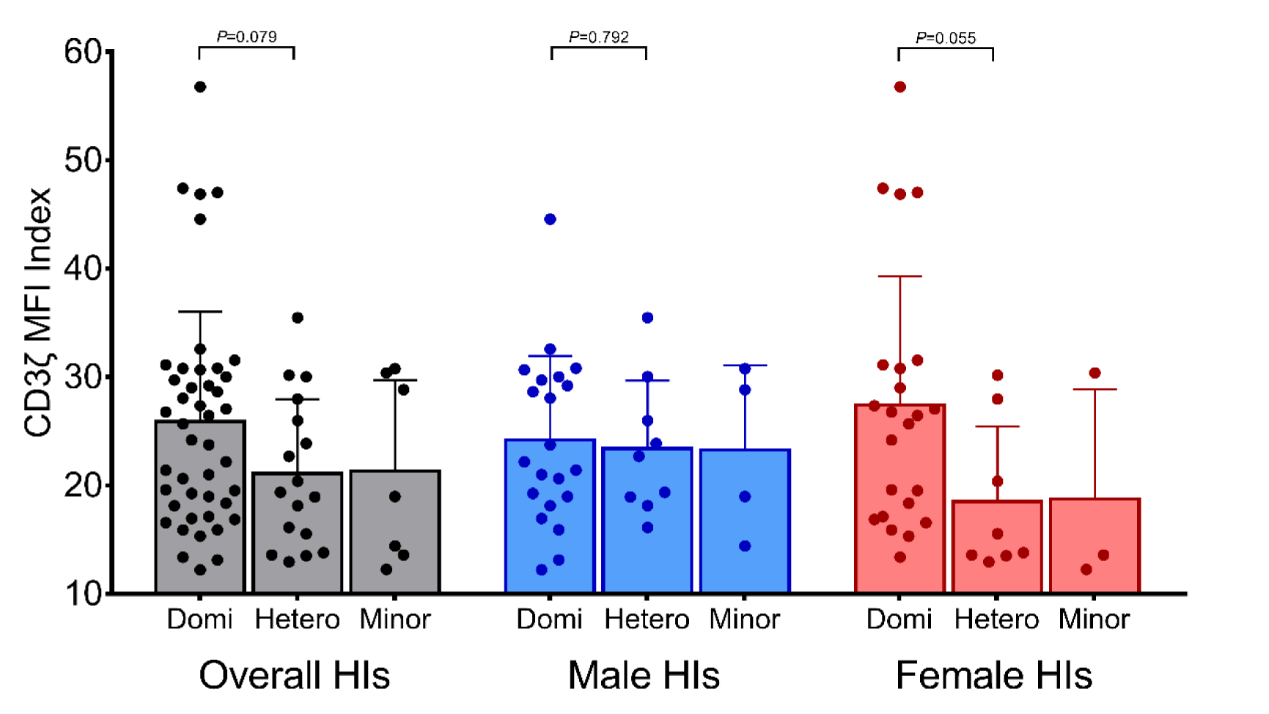
**

Figure S1. CD3ζ protein level with different genotypes of LD SNPs from Chines HIs.

Domi: 1292 delG/delG, 1403 CC, 1410 TT genotype; Hetero: 1292 delG/G, 1403 CG, 1410 TA genotype; Minor: 1292 G/G, 1403 GG, 1410 AA genotype.

Table S1. The sequence of primers for PCR

| Primers | Sequence (5'-3') |
| --- | --- |
| CD3ζ 3'-UTR-F | CAGCCAGGGGATTTCACCACTCAAAG |
| CD3ζ 3'-UTR-R | TCCTAGTACATTGACGGGTTTTTCCTG |
| 1184 C>G-F | CCAGGTGCAACCAGGGAG |
| 1184 C>G-R | TCTTGCTCCGCAGCACTTTA |
| 1292 delG-F | CCAGGTGCAACCAGGGAG |
| 1292 delG-R | TCCTAGTACATTGACGGGTTTTTCCTG |
| RV-F | CCG**CTCGAG**CAGCCAGGGGATTTCACCACTCAAAG |
| RV-R | AGCTTT**GTTTAAAC**TCCTAGTACATTGACGGGTTTTTCCTG |

Restriction sites were bolded in the text.
